# Supplementary material for: A novel efficient broadband near-infrared phosphor LiGaGe2O6:Cr3+ with EQE enhancement and spectral tuning by Sc3+–Ga3+ substitution for NIR pc-LED application
Source: Royal Society of Chemistry journal article supplement (doi:10.1039/d2qi02054h), 2022-11-18
Supplement: d2qi02054h1.pdf [file d2qi02054h1.pdf]

## Supporting Information

A novel efficient broadband near-infrared phosphor  $\text{LiGaGe}_2\text{O}_6:\text{Cr}^{3+}$  with  
EQE enhancement and spectral tuning by  $\text{Sc}^{3+}$ - $\text{Ga}^{3+}$  substitution for NIR  
pc-LED application

Jiaqi Fan <sup>a,1</sup>, Weiyang Zhou <sup>a,1</sup>, Jilin Zhang <sup>b</sup>, Peichan Chen <sup>c</sup>, Qi Pang <sup>c</sup>, Liya Zhou <sup>c</sup>,  
Chunyan Zhou <sup>d</sup>, Xinguo Zhang <sup>a\*□</sup>

<sup>a</sup> NMPA Key Laboratory for Research and Evaluation of Drug Metabolism, Guangdong  
Provincial Key Laboratory of New Drug Screening, School of Pharmaceutical Sciences, Southern  
Medical University, Guangzhou, 510515, China

<sup>b</sup> Key Laboratory of Chemical Biology and Traditional Chinese Medicine Research (Ministry of  
Education of China), College of Chemistry and Chemical Engineering, Hunan Normal University,  
Changsha, 410081, China

<sup>c</sup> School of Chemistry and Chemical Engineering, Guangxi University, Nanning 530004, China

<sup>d</sup> College of Pharmaceutical Science, Guangxi Medical University, Nanning, 530021, China

Corresponding author. *E-mail address:* [panzer@smu.edu.cn](mailto:panzer@smu.edu.cn) (X.G. Zhang);

---

● <sup>1</sup> These authors contributed equally to this work.  
Corresponding author. *E-mail address:* [panzer@smu.edu.cn](mailto:panzer@smu.edu.cn) (X.G. Zhang);

Table S1. Refinement parameters of LiGaGe<sub>2</sub>O<sub>6</sub>: 0.06Cr<sup>3+</sup> sample from the Rietveld Structure

| Analysis            |      |                                                                                                                                                             |         |        |           |                  |
|---------------------|------|-------------------------------------------------------------------------------------------------------------------------------------------------------------|---------|--------|-----------|------------------|
| Formula             |      | LiGa <sub>0.94</sub> Cr <sub>0.06</sub> Ge <sub>2</sub> O <sub>6</sub>                                                                                      |         |        |           |                  |
| Space group         |      | P12 <sub>1</sub> /c <sub>1</sub> (No.14) - monoclinic                                                                                                       |         |        |           |                  |
| Cell parameters     |      | $a = 9.8013(1) \text{ \AA}$ , $b = 8.7147(1) \text{ \AA}$ , $c = 5.3511(0) \text{ \AA}$ , $\beta = 108.91^\circ$<br>$V = 432.40(9) \text{ \AA}^3$ , $Z = 4$ |         |        |           |                  |
| Reliability factors |      | $R_{wp} = 7.81 \%$ , $R_p = 5.35 \%$                                                                                                                        |         |        |           |                  |
| Atom                | Site | $x$                                                                                                                                                         | $y$     | $z$    | occupancy | $U (\text{Å}^2)$ |
| Li1                 | 4e   | 0.270                                                                                                                                                       | 0.0233  | 0.217  | 1.0       | 0.0059(24)       |
| Ga1                 | 4e   | 0.2510                                                                                                                                                      | 0.65557 | 0.2103 | 0.94      | 0.0057(6)        |
| Cr1                 | 4e   | 0.2510                                                                                                                                                      | 0.65557 | 0.2103 | 0.06      | 0.0057(6)        |
| Ge1                 | 4e   | 0.04622                                                                                                                                                     | 0.3433  | 0.2690 | 1.0       | 0.0112(7)        |
| Ge2                 | 4e   | 0.55205                                                                                                                                                     | 0.8424  | 0.2297 | 1.0       | 0.0082(6)        |
| O1                  | 4e   | 0.8586                                                                                                                                                      | 0.3337  | 0.1552 | 1.0       | 0.0048(24)       |
| O2                  | 4e   | 0.1117                                                                                                                                                      | 0.5257  | 0.2723 | 1.0       | 0.040(5)         |
| O3                  | 4e   | 0.1108                                                                                                                                                      | 0.2883  | 0.5909 | 1.0       | 0.027(4)         |
| O4                  | 4e   | 0.3651                                                                                                                                                      | 0.8298  | 0.1014 | 1.0       | 0.018(4)         |
| O5                  | 4e   | 0.6285                                                                                                                                                      | 1.0085  | 0.3841 | 1.0       | 0.0055(24)       |
| O6                  | 4e   | 0.6103                                                                                                                                                      | 0.6977  | 0.4684 | 1.0       | 0.018(4)         |

Table S2 Transition energy and crystal field parameter of Li(Ga<sub>0.94-y</sub>Sc<sub>y</sub>)Ge<sub>2</sub>O<sub>6</sub>: 0.06Cr<sup>3+</sup>

| $y$  | $D_{dis}$ | ${}^4T_{2g}$<br>(cm <sup>-1</sup> ) | $\Delta E$<br>(cm <sup>-1</sup> ) | $\Delta S$<br>(cm <sup>-1</sup> ) | $Dq$<br>(cm <sup>-1</sup> ) | $\Delta E/Dq$ | $Dq/B$ | $B$<br>(cm <sup>-1</sup> ) |
|------|-----------|-------------------------------------|-----------------------------------|-----------------------------------|-----------------------------|---------------|--------|----------------------------|
| 0    | 0.0455    | 15313                               | 5962.6                            | 3265.7                            | 1368.0                      | 4.358         | 2.221  | 615.9                      |
| 0.1  | 0.0431    | 15220                               | 6055.8                            | 3244.3                            | 1359.8                      | 4.453         | 2.154  | 631.3                      |
| 0.2  | 0.0417    | 15083                               | 6193.6                            | 3206.5                            | 1347.9                      | 4.595         | 2.056  | 655.6                      |
| 0.3  | 0.0409    | 14947                               | 6328.9                            | 3182.9                            | 1335.5                      | 4.739         | 1.961  | 681.0                      |
| 0.4  | 0.0398    | 14815                               | 6461.7                            | 3159.8                            | 1323.5                      | 4.882         | 1.872  | 706.9                      |
| 0.5  | 0.0386    | 14706                               | 6570.7                            | 3145.1                            | 1313.3                      | 5.003         | 1.798  | 730.4                      |
| 0.6  | 0.0377    | 14577                               | 6699.3                            | 3135.6                            | 1300.9                      | 5.153         | 1.709  | 761.2                      |
| 0.7  | 0.0368    | 14492                               | 6783.8                            | 3142.0                            | 1292.1                      | 5.250         | 1.654  | 781.1                      |
| 0.8  | 0.0348    | 14430                               | 6846.5                            | 3130.5                            | 1286.5                      | 5.321         | 1.614  | 797.1                      |
| 0.94 | 0.0333    | 14388                               | 6888.1                            | 3122.5                            | 1282.6                      | 5.370         | 1.586  | 808.7                      |

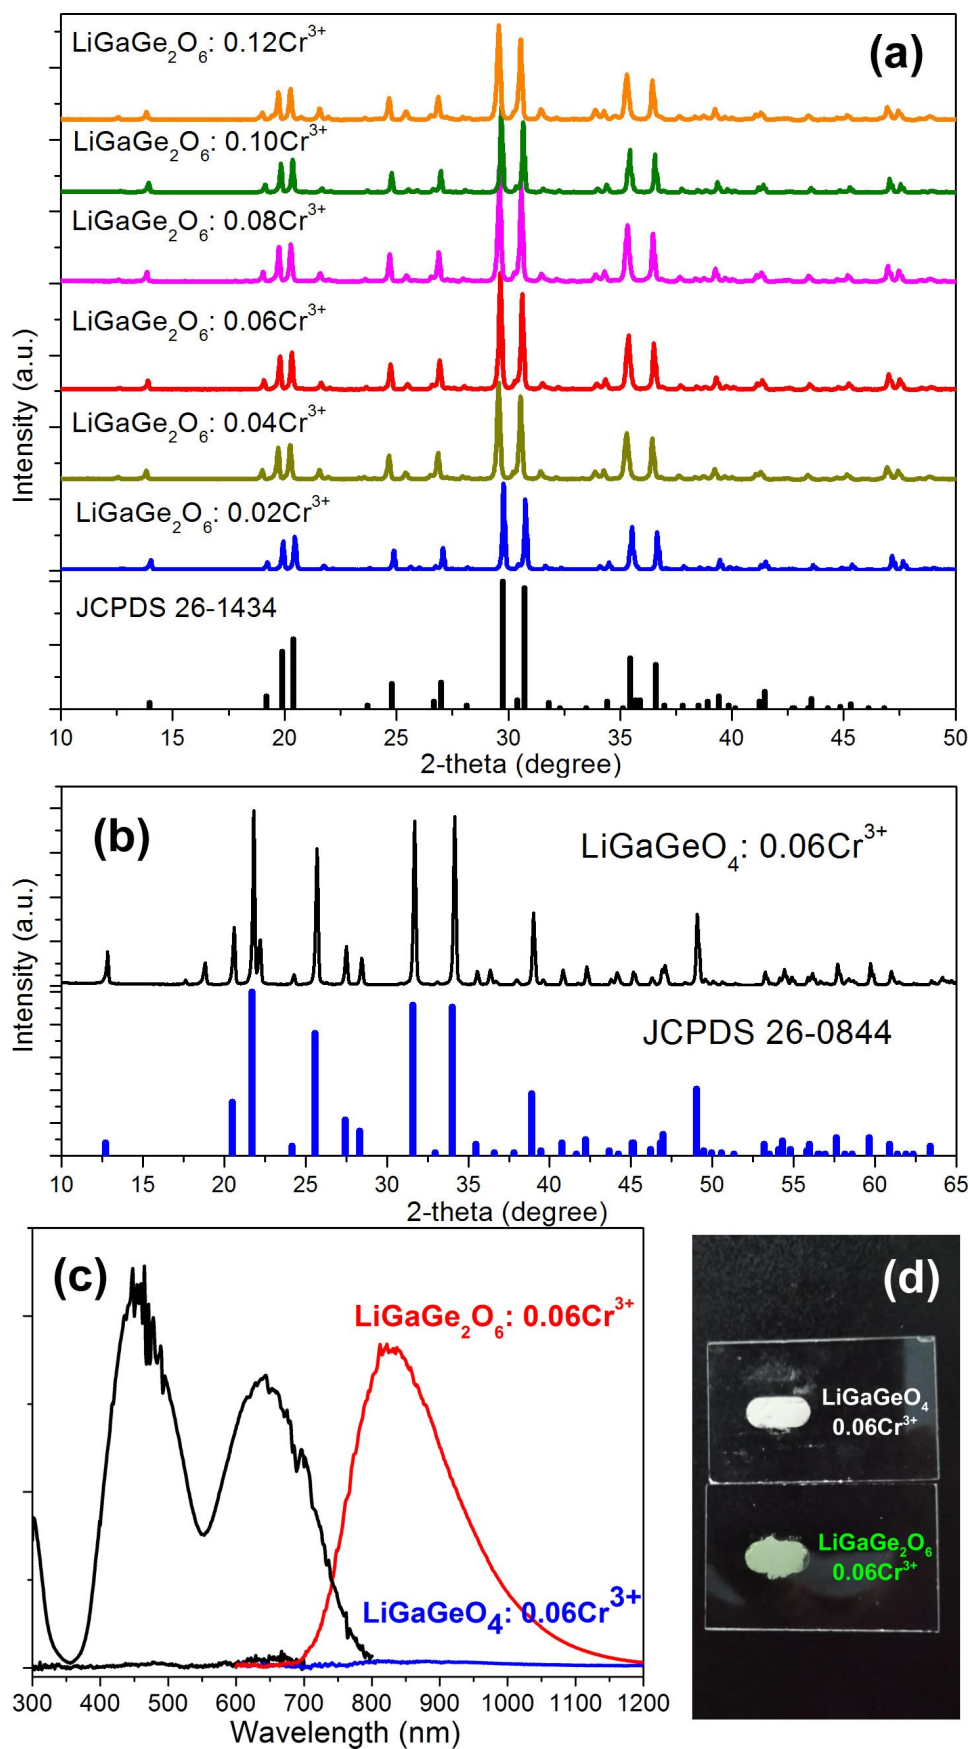

Fig.S1 XRD patterns of  $\text{LiGaGe}_2\text{O}_6: x\text{Cr}^{3+}$  (a) and  $\text{LiGaGeO}_4: \text{Cr}^{3+}$  (b) and the corresponding PL/PLE comparison (c) with sample picture (d)

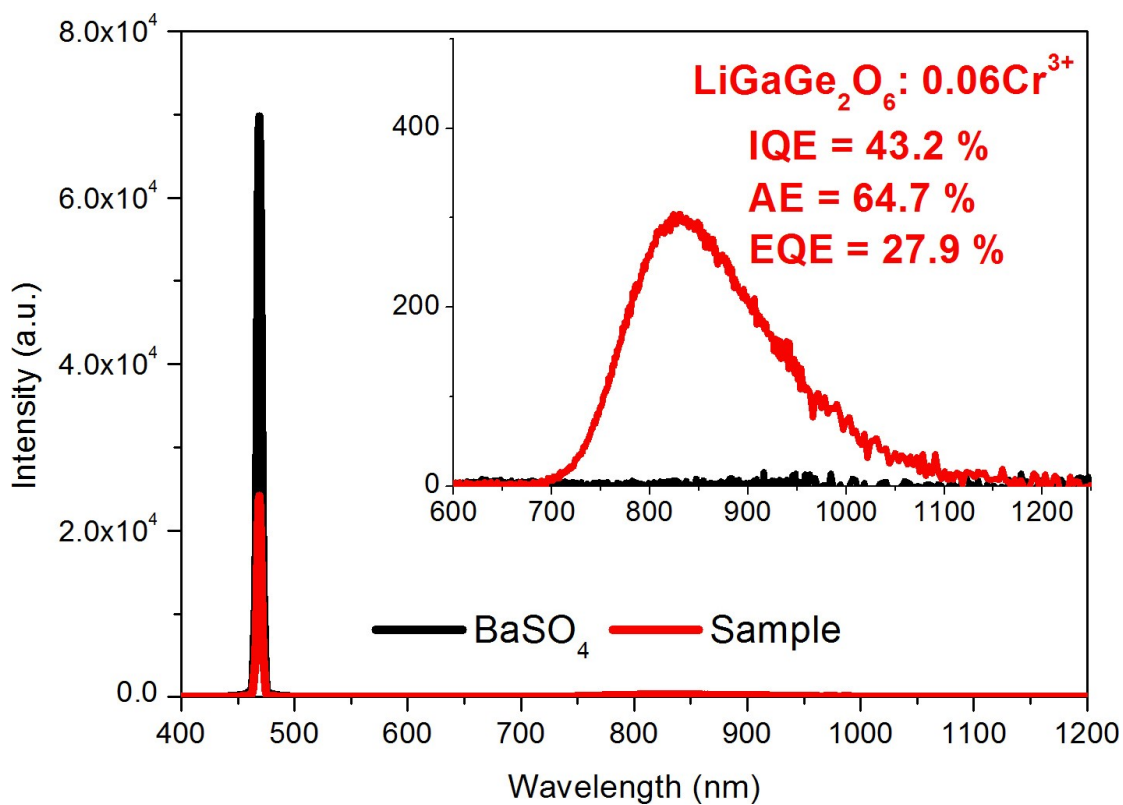

Figure S2. QY measurement spectra of LiGaGe<sub>2</sub>O<sub>6</sub>: 0.06Cr<sup>3+</sup>

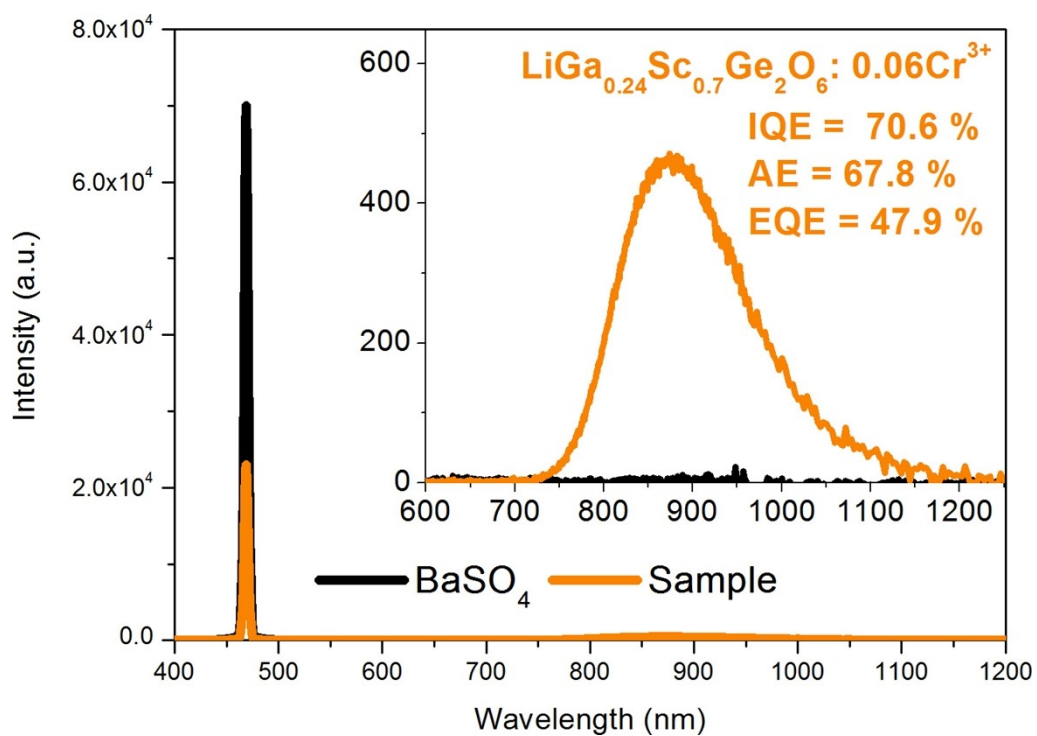

Figure S3. QY measurement spectra of Li(Ga<sub>0.24</sub>Sc<sub>0.7</sub>)Ge<sub>2</sub>O<sub>6</sub>: 0.06Cr<sup>3+</sup>

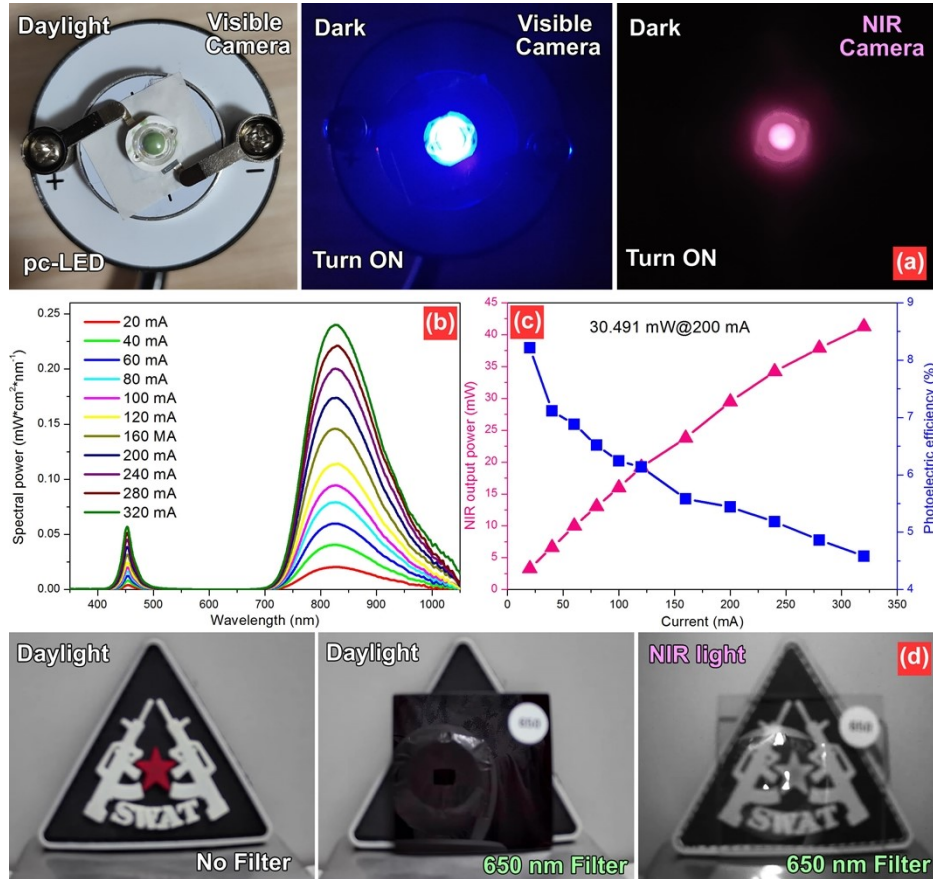

Figure S4. Electroluminescence spectra of the fabricated pc-NIR-LED device that combines a 460 nm InGa<sub>n</sub> blue LED chip with LiGa<sub>0.94</sub>Ge<sub>2</sub>O<sub>6</sub>: 0.06Cr<sup>3+</sup> NIR phosphor under a forward bias of 20~320 mA (a); Output power and photoelectric conversion efficiency variation of pc-NIR-LED with different currents (b); The working and nonworking state of LED device (c); Visible images and NIR images with and without 650 nm filter and under the fabricated NIR pc-LED lamp (d).
